# Supplementary material for: Lariat ethers with fluoroaryl side-arms: a study of CF⋯metal cation interaction in the complexes of N-(o-fluoroaryl)azacrown ethers
Source: Royal Society of Chemistry journal article supplement (doi:10.1039/b807199c), 2008-12-04
Supplement: b807199c.pdf [file b807199c.pdf]

# Lariat ethers with fluoroaryl side-arms: a study of CF...metal cation interaction in the complexes of *N*-(*o*-fluoroaryl)azacrown ethers

Petr K. Sazonov<sup>\*a</sup>, Lidiya Kh. Minacheva<sup>b</sup>, Andrei V. Churakov<sup>b</sup>, Vladimir S. Sergienko<sup>b</sup>, Galina A. Artamkina<sup>a</sup>, Yuri F. Oprunenko<sup>a</sup>, and Irina P. Beletskaya<sup>\*a</sup>

<sup>a</sup> *Chemistry Department of the M.V. Lomonosov Moscow State University, 119992*

*Moscow.Fax: +7 495 939 3618; e-mail: beletska@org.chem.msu.ru*

<sup>b</sup> *N.S. Kurnakov Institute of General and Inorganic Chemistry RAS, 119991 Moscow Fax:*

*+7 495 954 1279; e-mail: [min@igic.ras.ru](mailto:min@igic.ras.ru)*

## Electronic supplementary information

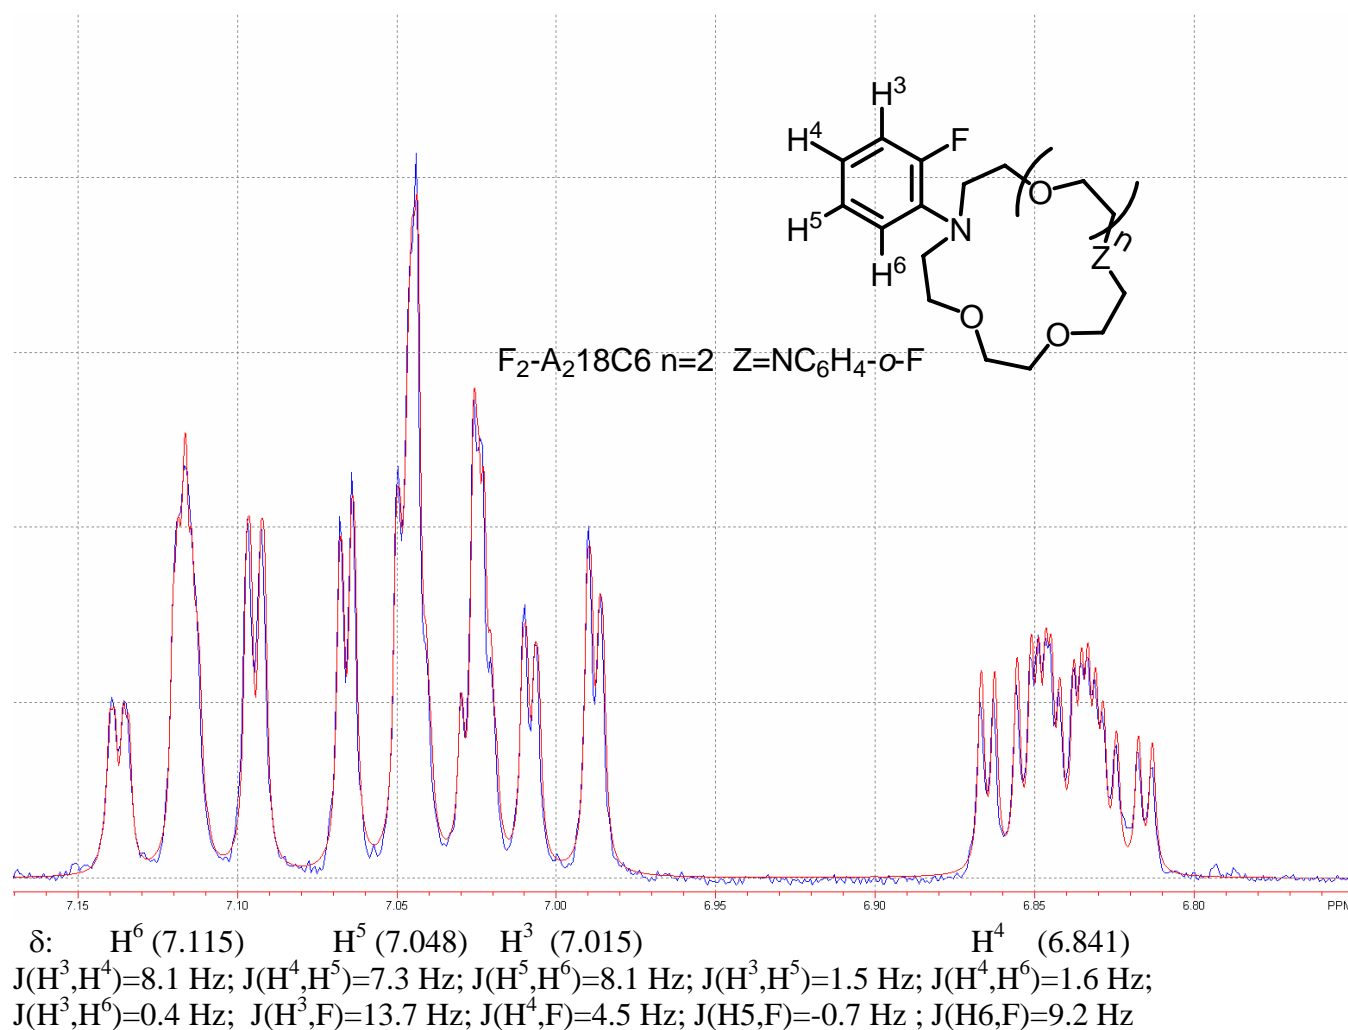

Figure S1. Experimental (blue, in acetone-*d*<sub>6</sub>) and simulated (red, with parameters given above) <sup>1</sup>H NMR spectra of aromatic protons of F<sub>2</sub>-A<sub>2</sub>18C6. Simulation performed with WinNuts program.

|                                                |                                                                         |                                  |
|------------------------------------------------|-------------------------------------------------------------------------|----------------------------------|
| <b>Acquisition Time (sec)</b> (0.1280, 0.0320) | <b>Comment</b> F2A2 NOESY                                               | <b>Date</b> 15 Sep 2008 11:13:00 |
| <b>Date Stamp</b> Sep 12 2008                  | <b>File Name</b> G:\NMR SpectralData\F2A2_NOESY_12Sep2008\NOESY.fid\fid |                                  |
| <b>Frequency (MHz)</b> (400.45, 400.45)        | <b>Nucleus</b> (1H, 1H)                                                 | <b>Number of Transients</b> 32   |
| <b>Original Points Count</b> (512, 128)        | <b>Points Count</b> (1024, 256)                                         | <b>Pulse Sequence</b> NOESY      |
| <b>Solvent</b> Acetone                         | <b>Sweep Width (Hz)</b> (4000.00, 4000.00)                              |                                  |

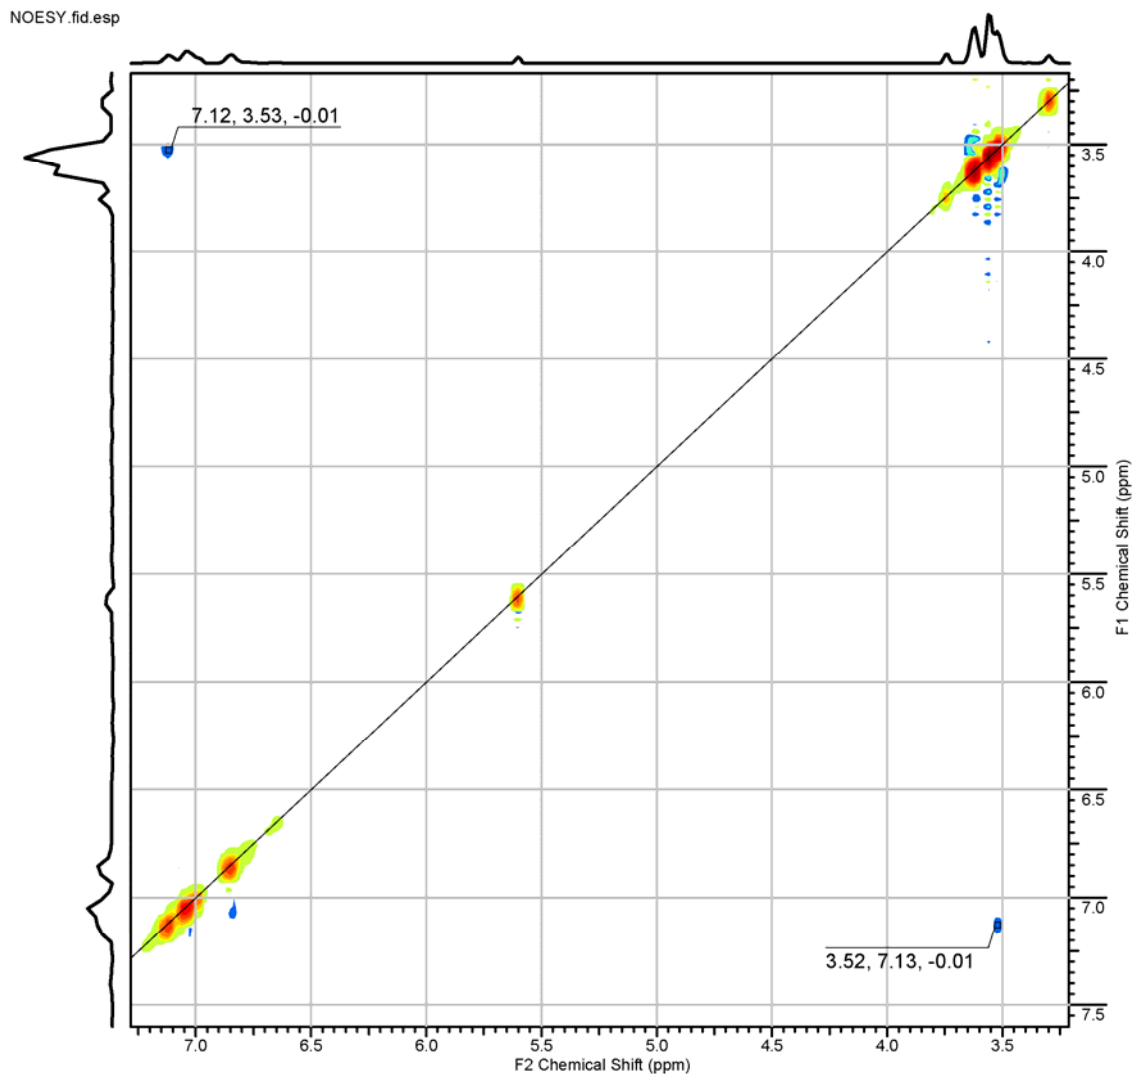

Figure S2. 2D NOESY spectrum of F<sub>2</sub>-A<sub>2</sub>18C<sub>6</sub> (acetone d<sub>6</sub>). Cross-peaks observed between a triplet at 7.12 ppm and a triplet at 3.52 ppm allow to assign these signals to protons H<sup>6</sup> and NCH<sub>2</sub>, respectively.

|                                                |                                                                         |                                  |
|------------------------------------------------|-------------------------------------------------------------------------|----------------------------------|
| <b>Acquisition Time (sec)</b> (0.1280, 0.0320) | <b>Comment</b> F3A3 NOESY                                               | <b>Date</b> 23 Sep 2008 10:55:00 |
| <b>Date Stamp</b> Sep 22 2008                  | <b>File Name</b> G:\NMR SpectralData\F3A3_NOESY_22Sep2008\NOESY.fid\fid |                                  |
| <b>Frequency (MHz)</b> (400.45, 400.45)        | <b>Nucleus</b> (1H, 1H)                                                 | <b>Number of Transients</b> 32   |
| <b>Original Points Count</b> (512, 128)        | <b>Points Count</b> (512, 128)                                          | <b>Pulse Sequence</b> NOESY      |
| <b>Solvent</b> Acetone                         | <b>Sweep Width (Hz)</b> (4000.00, 4000.00)                              |                                  |

NOESY.fid.esp

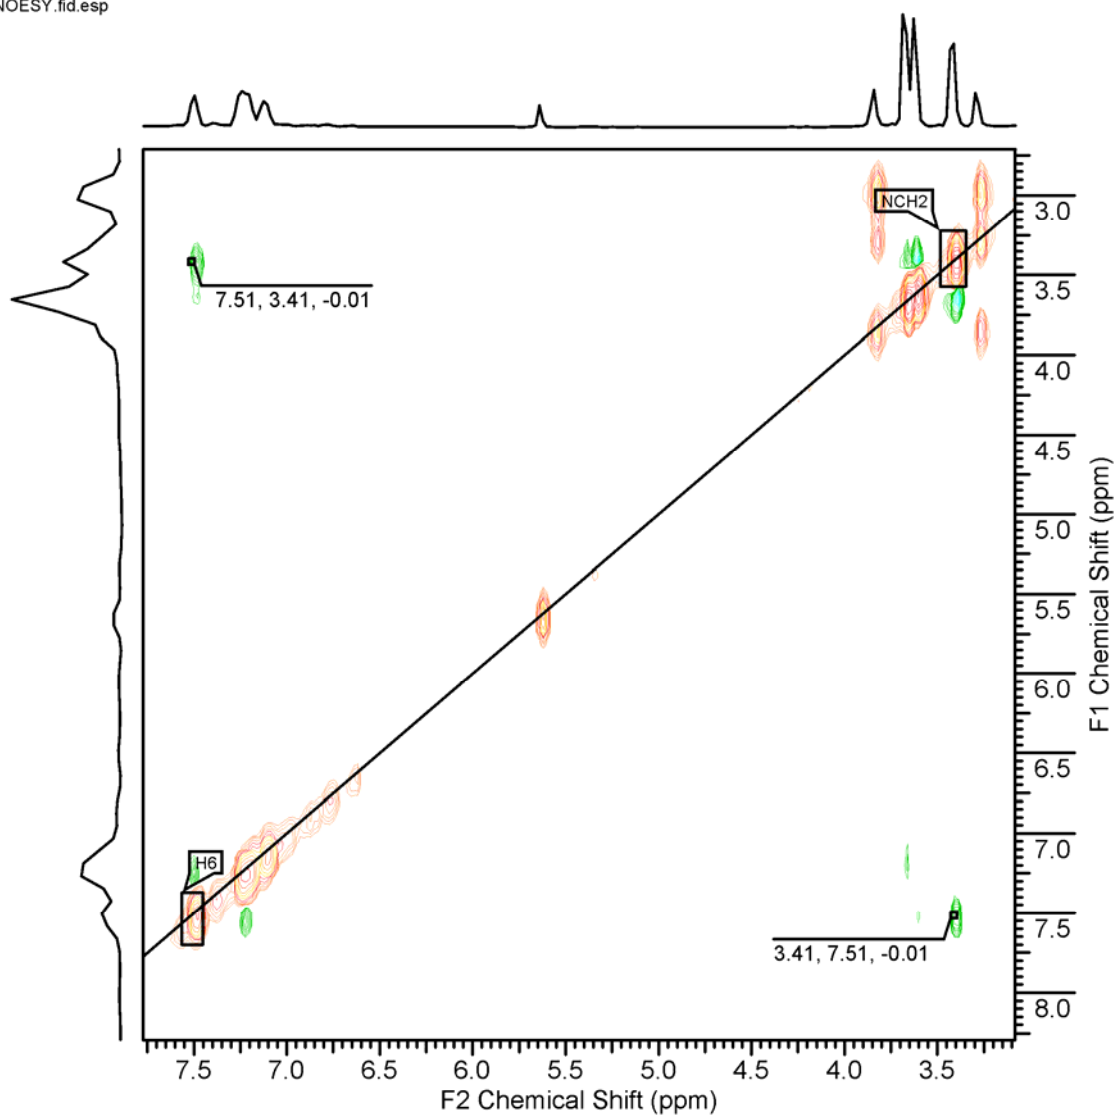

Figure S3. 2D NOESY spectrum of the  $\text{Na}^+$  complex of  $\text{F}_2\text{-A}_{218}\text{C}_6$  (acetone  $\text{d}_6$ , 3 equiv.  $\text{NaI}$ ). Cross-peaks observed between a triplet at 7.51 ppm and a triplet at 3.41 ppm allow to assign these signals to protons  $\text{H}^6$  and  $\text{NCH}_2$ , respectively.

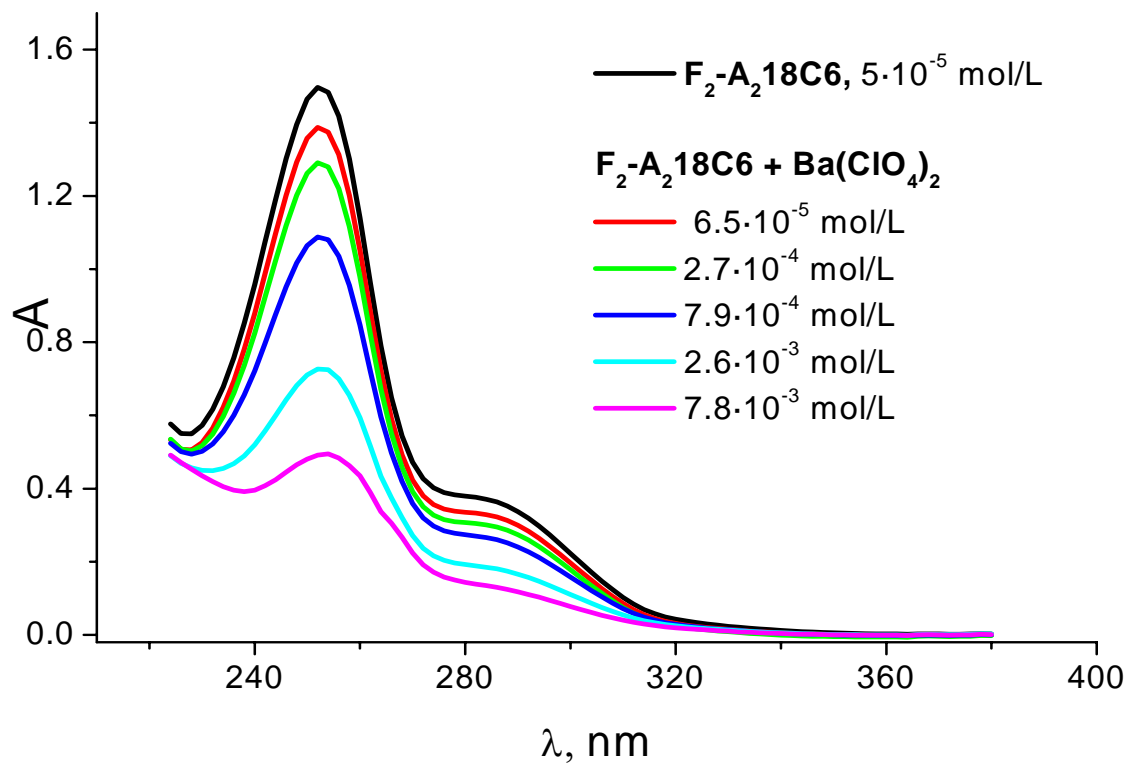

Figure S4. UV-spectra of  $F_2-A_218C6$  ( $5 \cdot 10^{-5}$  mol/L, methanol,  $22^\circ C$ ) as a function of  $Ba(ClO_4)_2$  concentration.

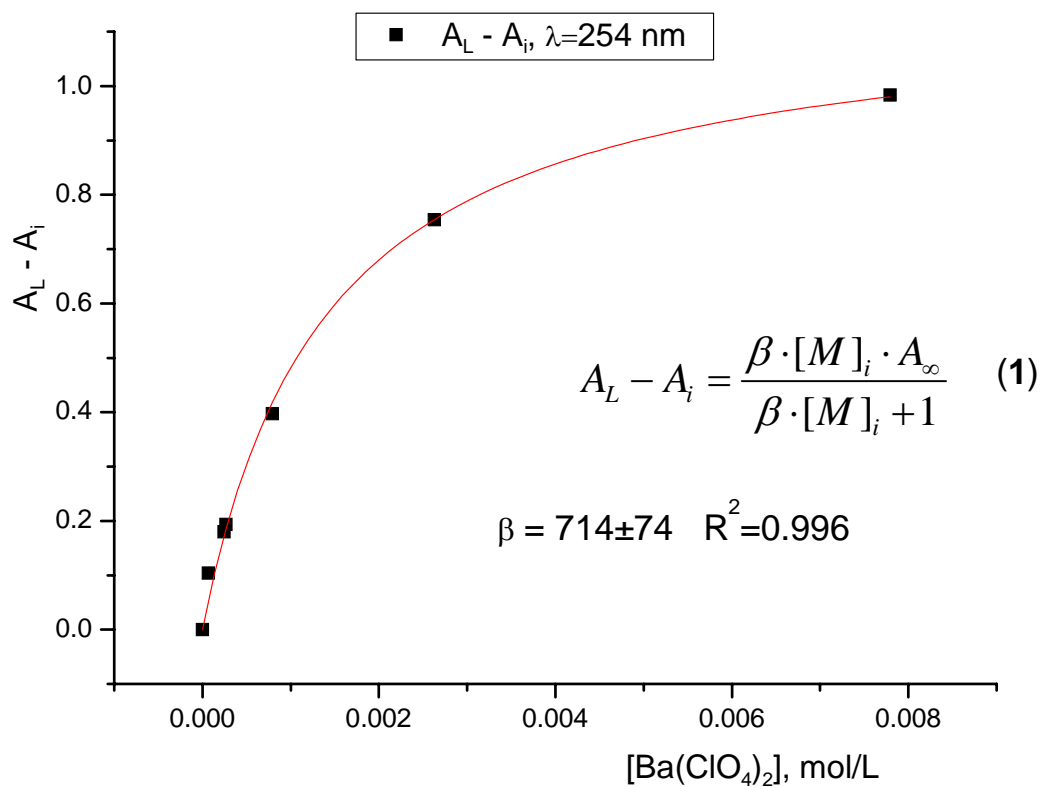

Figure S5. The dependence of the absorbance of F<sub>2</sub>-A<sub>2</sub>18C6 (at 254 nm) on the concentration of Ba(ClO<sub>4</sub>)<sub>2</sub> (methanol, 22°C) and its fitting to equation (1). A<sub>L</sub> is the absorbance of the starting ligand solution, [M]<sub>i</sub> is the molar concentration of the metal salt, metal binding constant (β) and the absorbance of the complex (A<sub>∞</sub>) are the objective variables.
